# Supplementary material for: The Effect of a 13-Valent Conjugate Pneumococcal Vaccine on Circulating Antibodies Against Oxidized LDL and Phosphorylcholine in Man, A Randomized Placebo-Controlled Clinical Trial
Source: MDPI journal article supplement (doi:10.3390/biology9110345), 2020-10-22
Supplement: s1 [file s1]

# Supplemental figure

## A

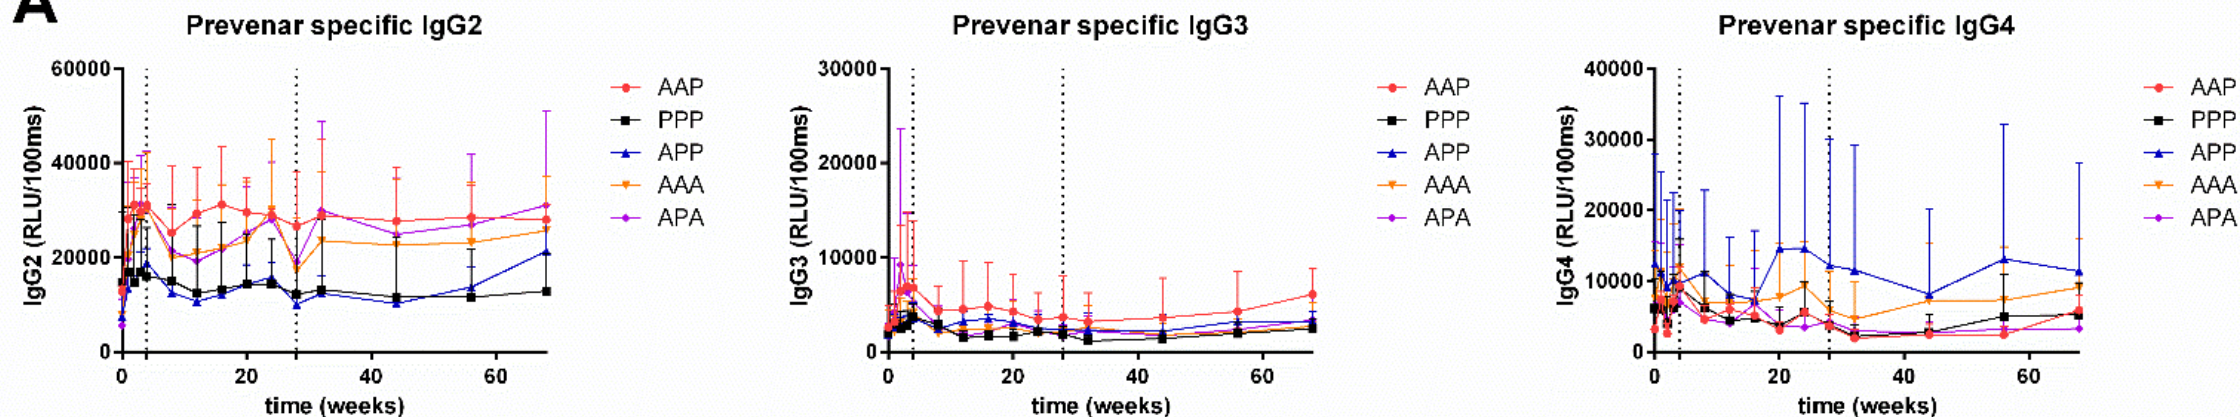

## B

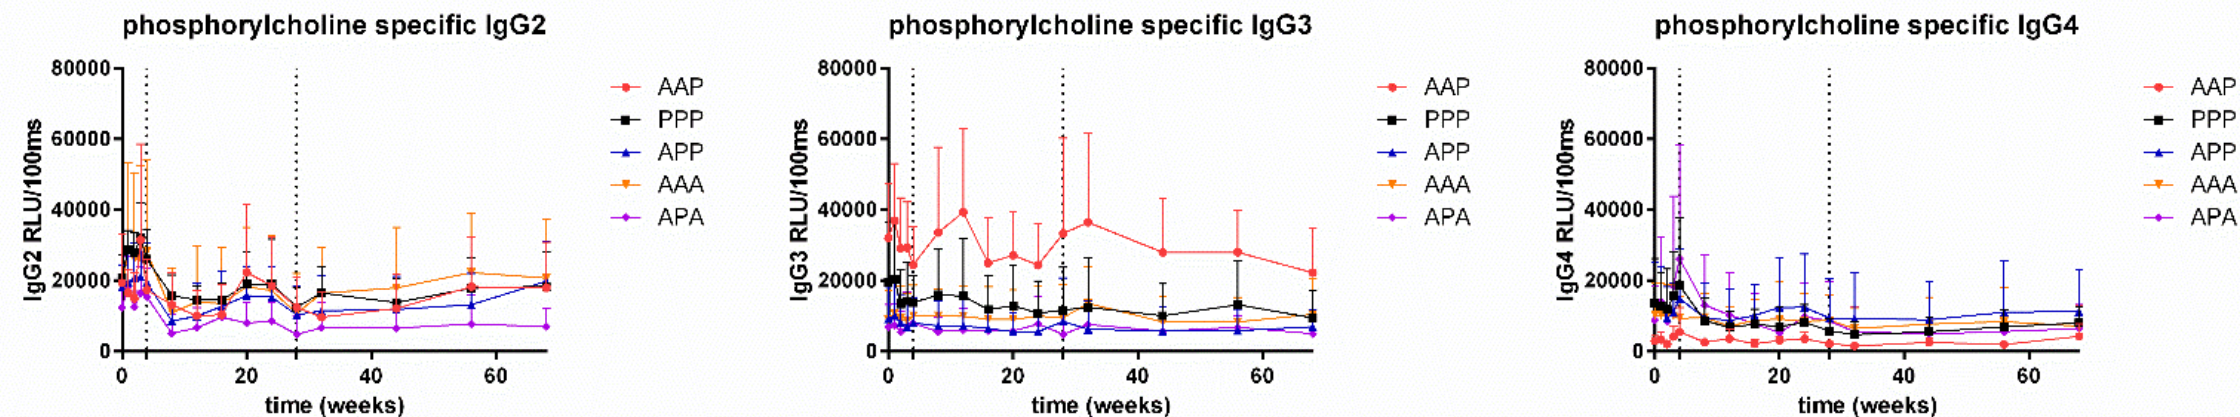

Figure S1: Prevenar-specific (panel A) and phosphorylcholine-specific (panel B) IgG subclass responses (mean + SD). N=4 per group, n=3 for AAP, n=8 for placebo. RLU/100ms: relative light units/100ms. 'A': active treatment, 'P': placebo treatment. Dotted lines indicate vaccinations (baseline, 4 weeks, 28 weeks). Statistical analysis using a mixed model analysis of variance with fixed factors: treatment group and time, and the interaction of treatment group and subject as random factor.
